# Supplementary material for: Array CGH-based detection of CNV regions and their potential association with reproduction and other economic traits in Holsteins
Source: PubMed Central journal article supplement (PMC6407259; doi:10.1186/s12864-019-5552-1), 2019-03-07

**A**

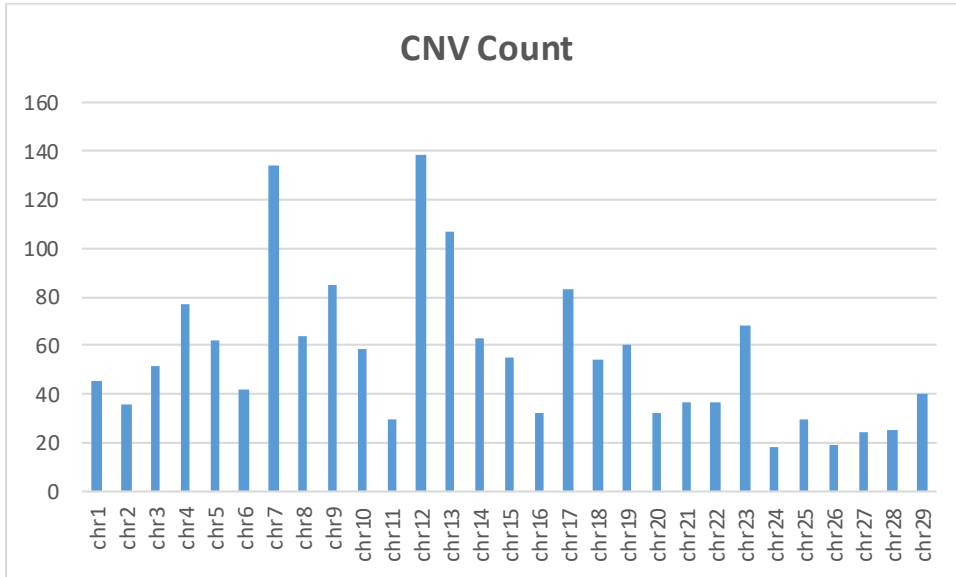

**B**

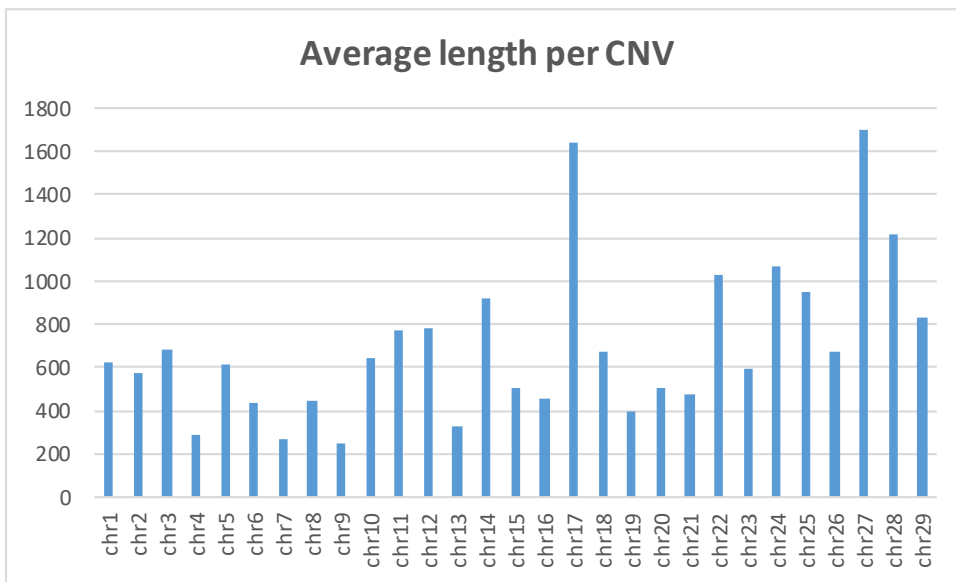

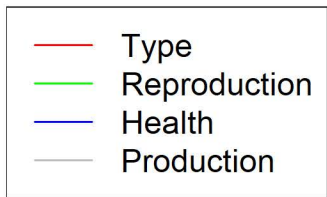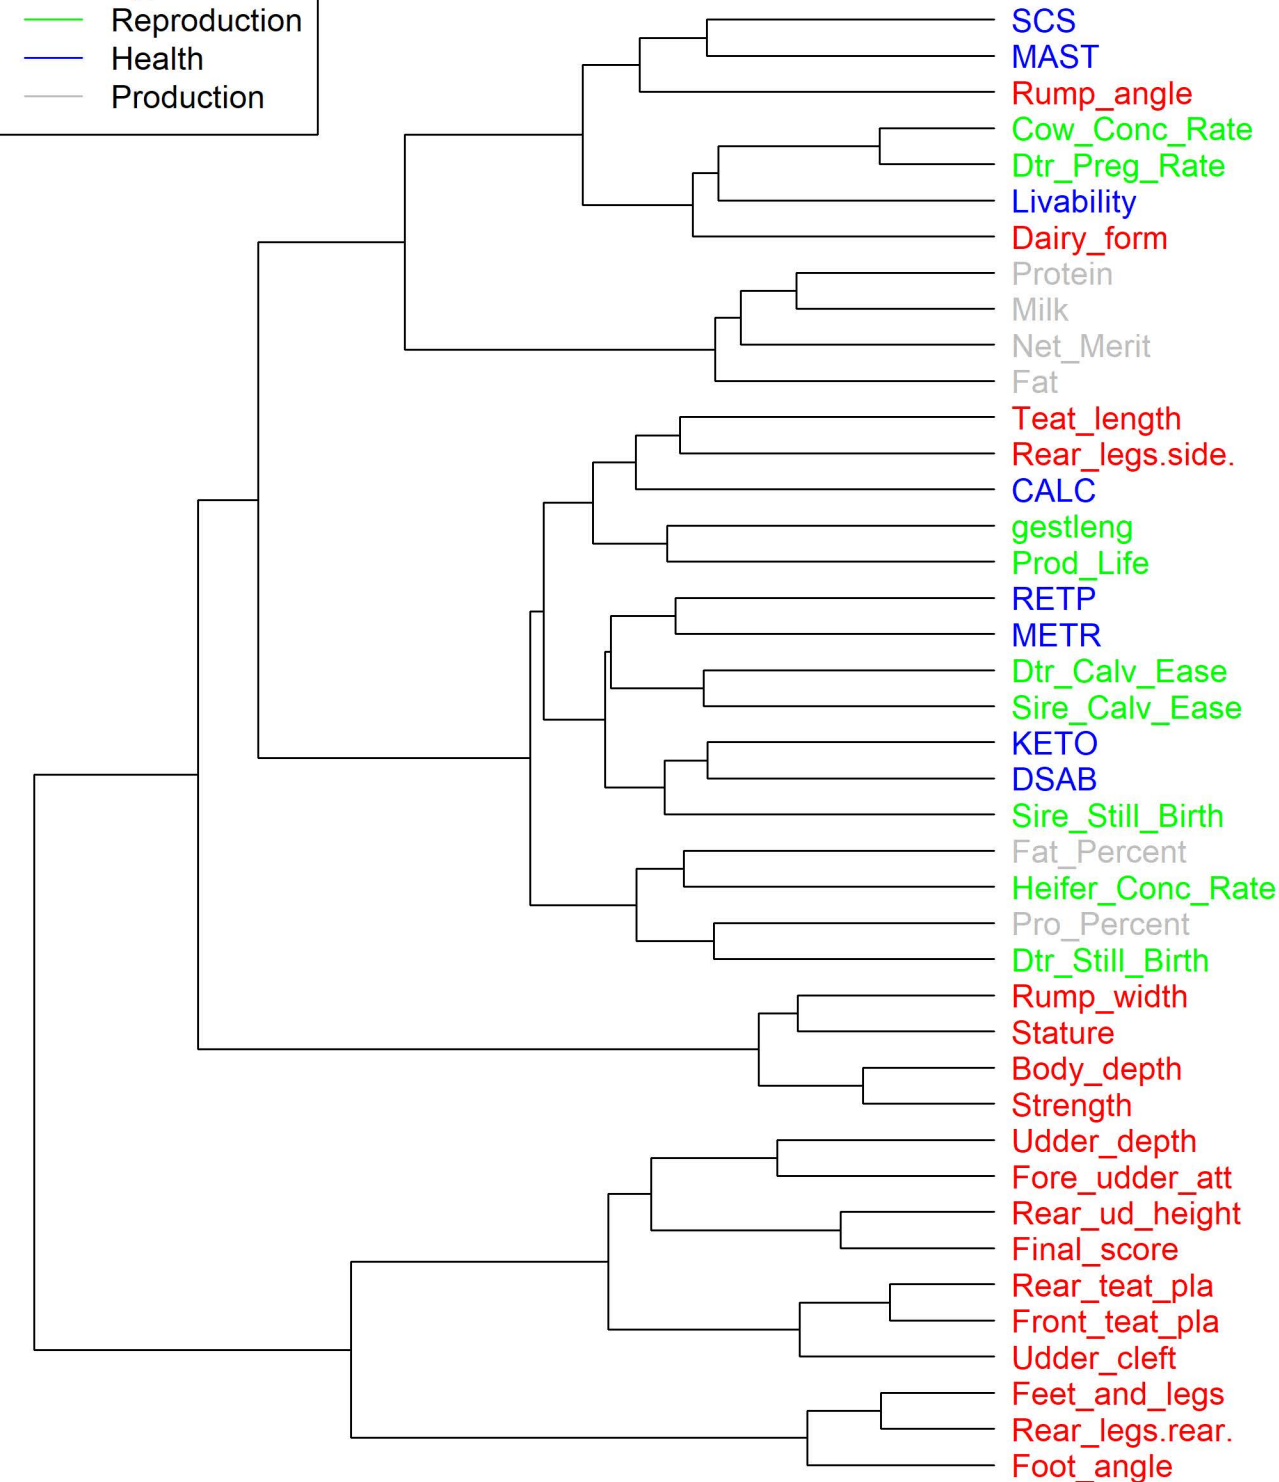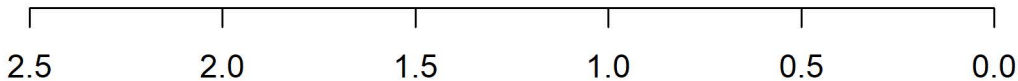

Supplement: 12864_2019_5552_MOESM1_ESM.pdf [file 12864_2019_5552_MOESM1_ESM.pdf]
